# Supplementary material for: Carbohydrate Intake and Risk of Cardiovascular Disease: A Systematic Review and Meta-Analysis of Prospective Studies
Source: MDPI journal article supplement (doi:10.3390/nu15071740), 2023-04-02
Supplement: s1 [file s1]

*Supplementary Material*

**Article Title**

**Carbohydrate intake and risk of cardiovascular disease: A systematic review and meta-analysis of prospective studies**

**Unhui Jo and Kyong Park\***

**\* Correspondence:** Kyong Park: kypark@ynu.ac.kr

Table S1. Quality assessment of included studies by NOS for prospective cohort studies

| No. | Study (year)                   | Score     |   |   |               |   |         |   |   | Total | Quality |
|-----|--------------------------------|-----------|---|---|---------------|---|---------|---|---|-------|---------|
|     |                                | Selection |   |   | Comparability |   | Outcome |   |   |       |         |
|     |                                | 1         | 2 | 3 | 4             | 5 | 6       | 7 | 8 |       |         |
| 1   | Liu <i>et al.</i> (2000)       | 1         | 1 | 0 | 1             | 1 | 1       | 1 | 1 | 7     | Good    |
| 2   | Oh <i>et al.</i> (2005)        | 1         | 1 | 0 | 1             | 1 | 1       | 1 | 1 | 7     | Good    |
| 3   | Beulens <i>et al.</i> (2007)   | 1         | 1 | 0 | 1             | 1 | 1       | 1 | 0 | 6     | Good    |
| 4   | Jakobsen <i>et al.</i> (2009)  | 1         | 1 | 0 | 1             | 1 | 0       | 1 | 0 | 5     | Fair    |
| 5   | Sieri <i>et al.</i> (2010)     | 1         | 1 | 0 | 1             | 1 | 1       | 1 | 1 | 7     | Good    |
| 6   | Burger <i>et al.</i> (2011)    | 1         | 1 | 0 | 1             | 1 | 1       | 1 | 0 | 6     | Good    |
| 7   | Wallström <i>et al.</i> (2012) | 1         | 1 | 0 | 1             | 1 | 1       | 1 | 1 | 7     | Good    |
| 8   | Sieri <i>et al.</i> (2013)     | 1         | 1 | 0 | 1             | 1 | 1       | 1 | 1 | 7     | Good    |
| 9   | Similä <i>et al.</i> (2013)    | 1         | 1 | 0 | 1             | 1 | 1       | 1 | 0 | 6     | Good    |
| 10  | Yu <i>et al.</i> (2013)        | 1         | 1 | 0 | 1             | 1 | 1       | 1 | 1 | 7     | Good    |
| 11  | Li <i>et al.</i> (2015)        | 1         | 1 | 0 | 1             | 1 | 1       | 1 | 1 | 7     | Good    |
| 12  | Sonestedt <i>et al.</i> (2015) | 1         | 1 | 0 | 1             | 1 | 1       | 1 | 1 | 7     | Good    |

|    |                                 |   |   |   |   |   |   |   |   |   |      |
|----|---------------------------------|---|---|---|---|---|---|---|---|---|------|
| 13 | Yu <i>et al.</i> (2016)         | 1 | 1 | 0 | 1 | 1 | 1 | 1 | 1 | 7 | Good |
| 14 | Dehghan <i>et al.</i> (2017)    | 1 | 1 | 0 | 1 | 1 | 0 | 1 | 1 | 6 | Good |
| 15 | AlEssa <i>et al.</i> (2018)     | 1 | 1 | 0 | 1 | 1 | 1 | 1 | 1 | 7 | Good |
| 16 | Darjoko <i>et al.</i> (2019)    | 1 | 1 | 0 | 1 | 0 | 1 | 1 | 0 | 5 | Fair |
| 17 | Ho <i>et al.</i> (2020)         | 1 | 1 | 1 | 1 | 1 | 1 | 1 | 0 | 7 | Good |
| 18 | Choi <i>et al.</i> (2022)       | 1 | 1 | 1 | 0 | 1 | 1 | 1 | 0 | 6 | Good |
| 19 | Gribbin <i>et al.</i> (2022)    | 1 | 1 | 0 | 1 | 2 | 0 | 1 | 0 | 6 | Good |
| 20 | Haugsgjerd <i>et al.</i> (2022) | 1 | 1 | 0 | 1 | 1 | 1 | 1 | 1 | 7 | Good |
| 21 | Jo <i>et al.</i> (2022)         | 1 | 1 | 1 | 1 | 1 | 0 | 1 | 0 | 6 | Good |
| 22 | Lim <i>et al.</i> (2022)        | 1 | 1 | 0 | 1 | 1 | 1 | 1 | 1 | 7 | Good |
| 23 | McKenzie <i>et al.</i> (2022)   | 1 | 1 | 1 | 1 | 1 | 1 | 1 | 0 | 7 | Good |

---

NOS, Newcastle–Ottawa Scale.

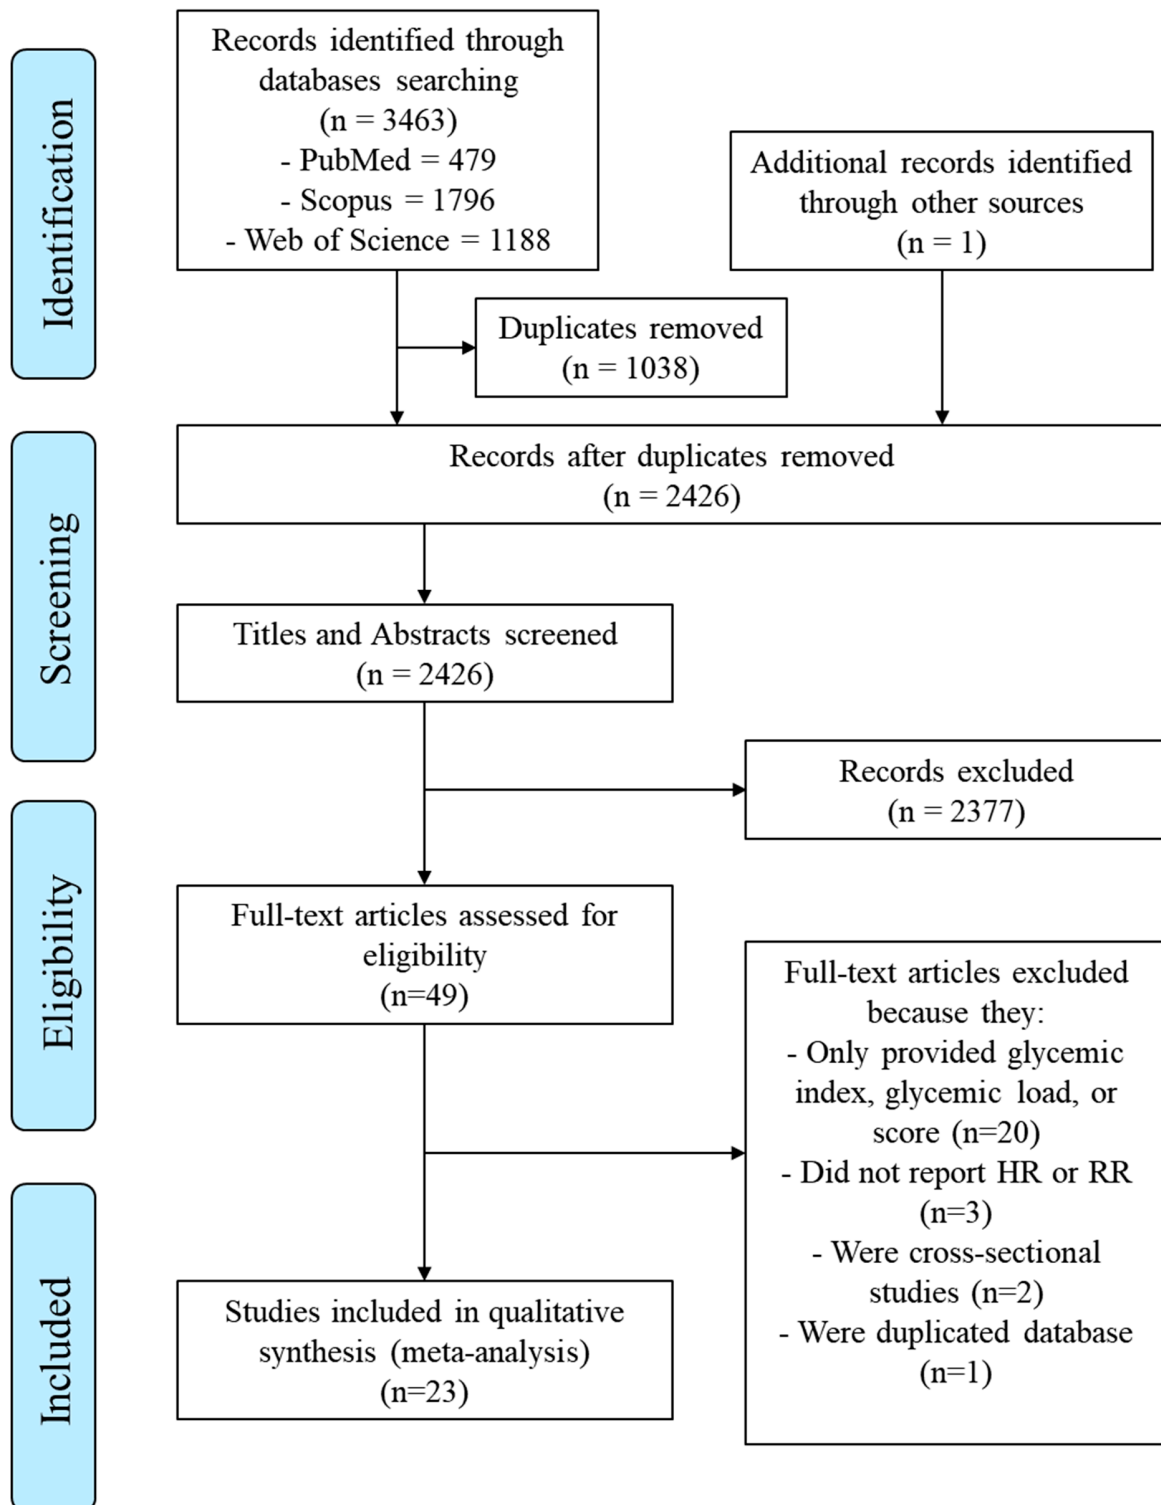

Figure S1. Flow chart of study selection for the meta-analysis

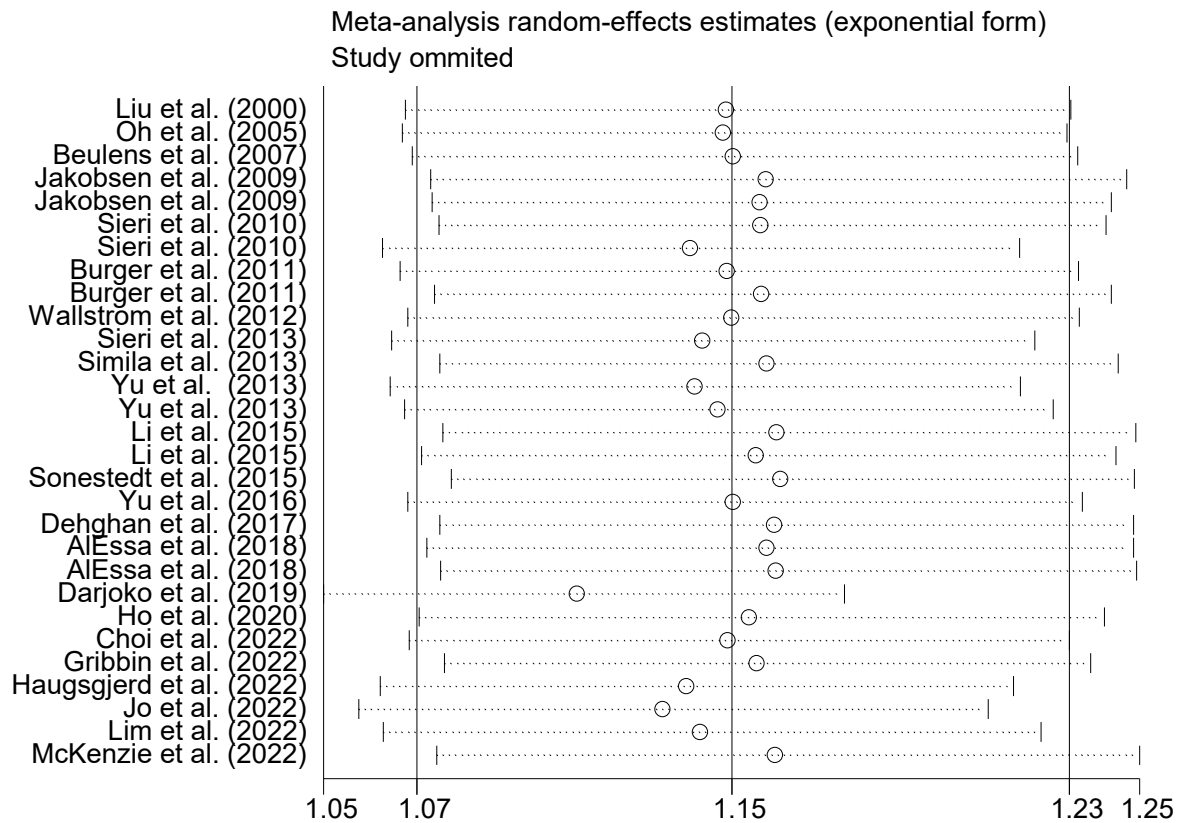

Figure S2 . Influence analysis of pooled hazard ratio/relative risks

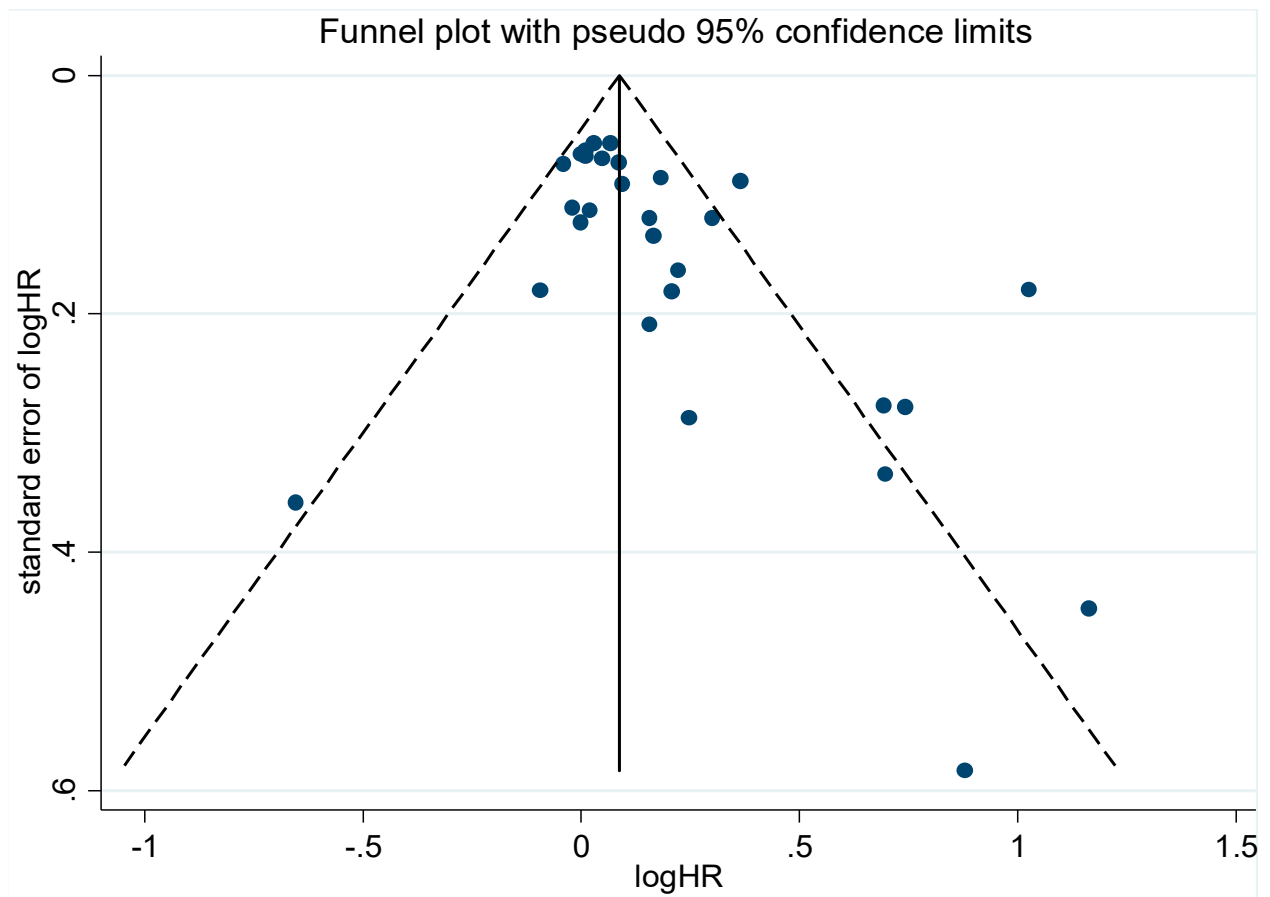

Figure S3. Funnel plot for publication bias

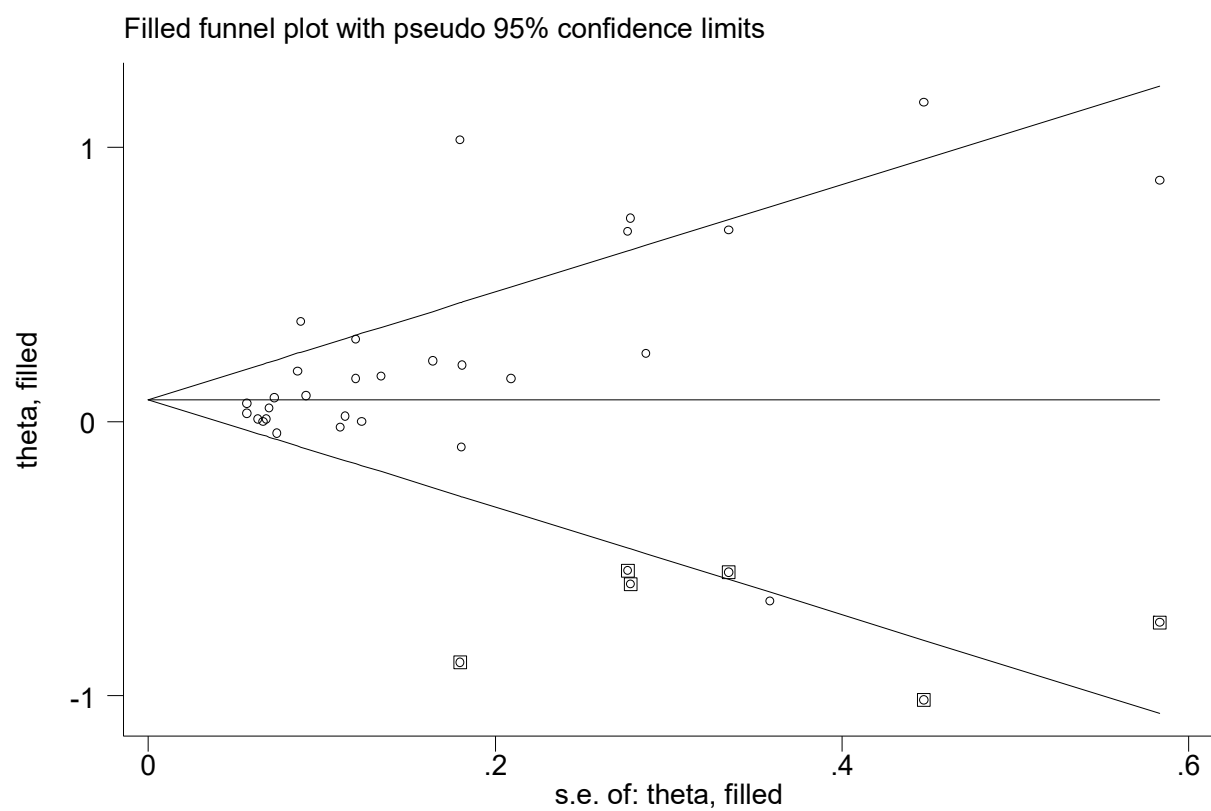

Figure S4. Trim and fill
